# Supplementary material
Source: PubMed Central journal article supplement (PMC7042481)
Supplement: mmc1.pdf [file mmc1.pdf]

**The American Journal of Human Genetics, Volume 106**

**Supplemental Data**

**UK Biobank Whole-Exome Sequence Binary Phenome**

**Analysis with Robust Region-Based Rare-Variant Test**

**Zhangchen Zhao, Wenjian Bi, Wei Zhou, Peter VandeHaar, Lars G. Fritsche, and Seunggeun Lee**

# Supplemental Figures

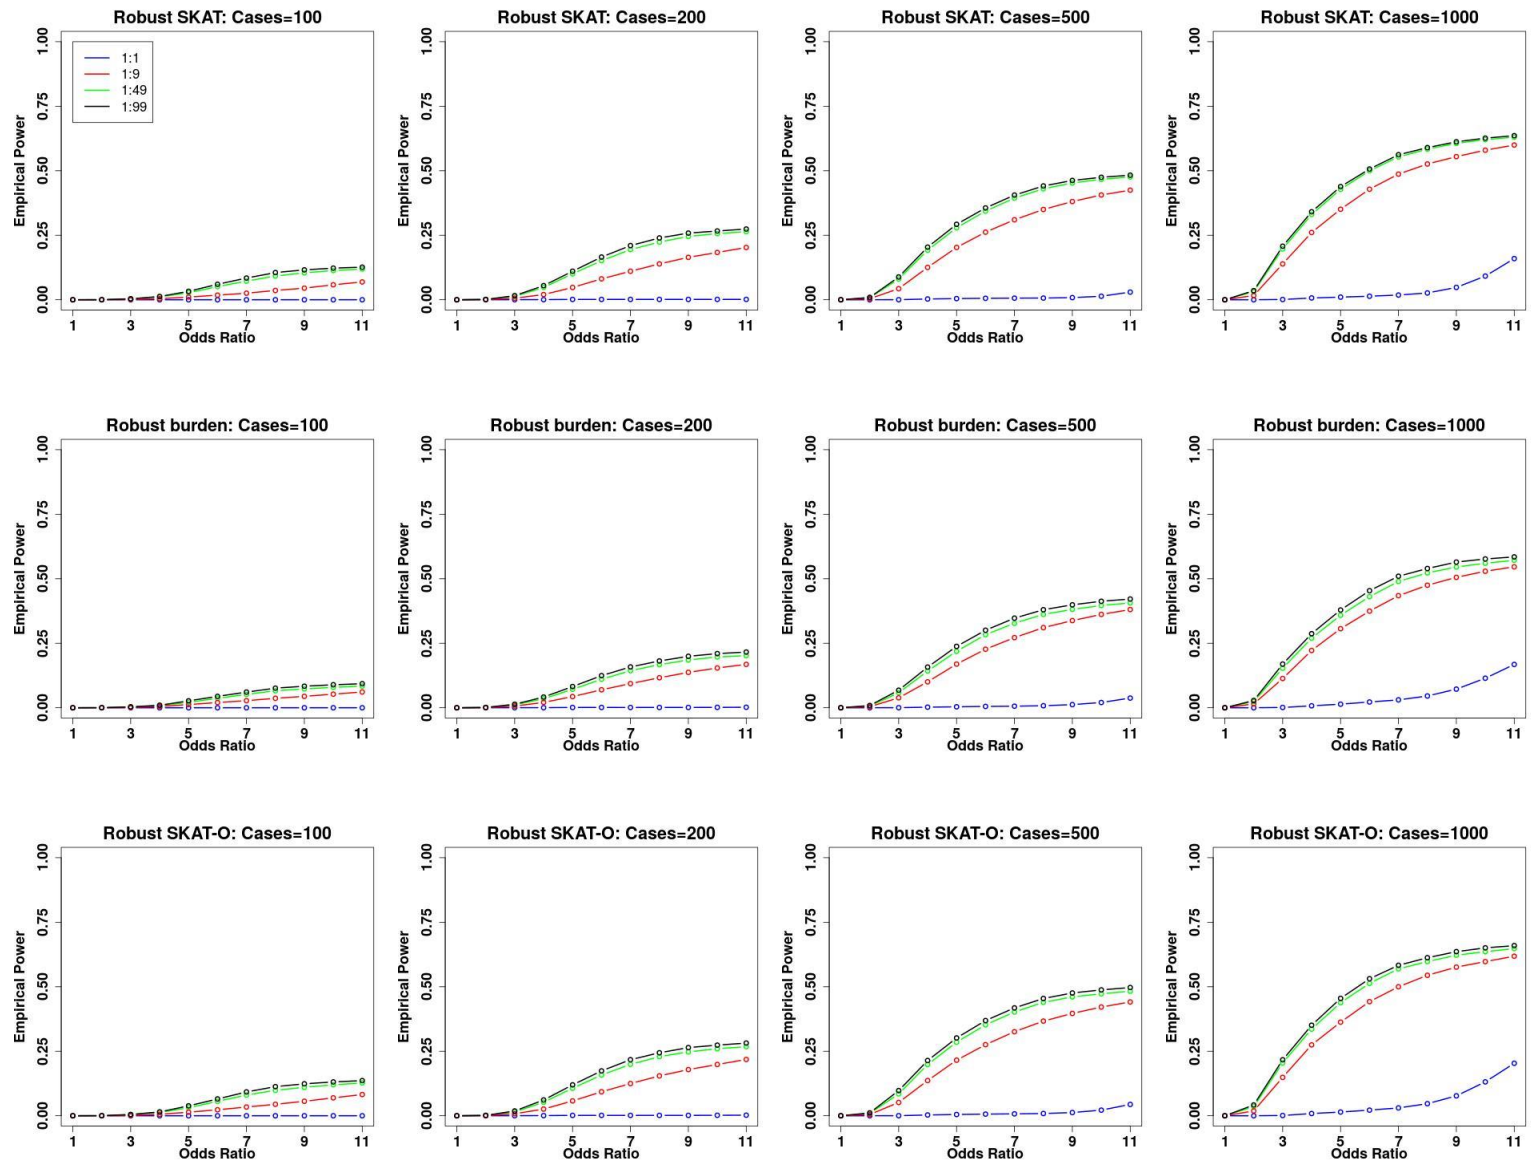

Figure S1. Empirical power estimates for robust SKAT, burden, SKAT-O with the same number of cases across different case control ratios. 30% of variants were causal variants and all causal variants were risk-increasing. The X-axis represents the genetic effect odds ratio and the Y-axis represents the empirical power. All causal variants had the same odds ratios.

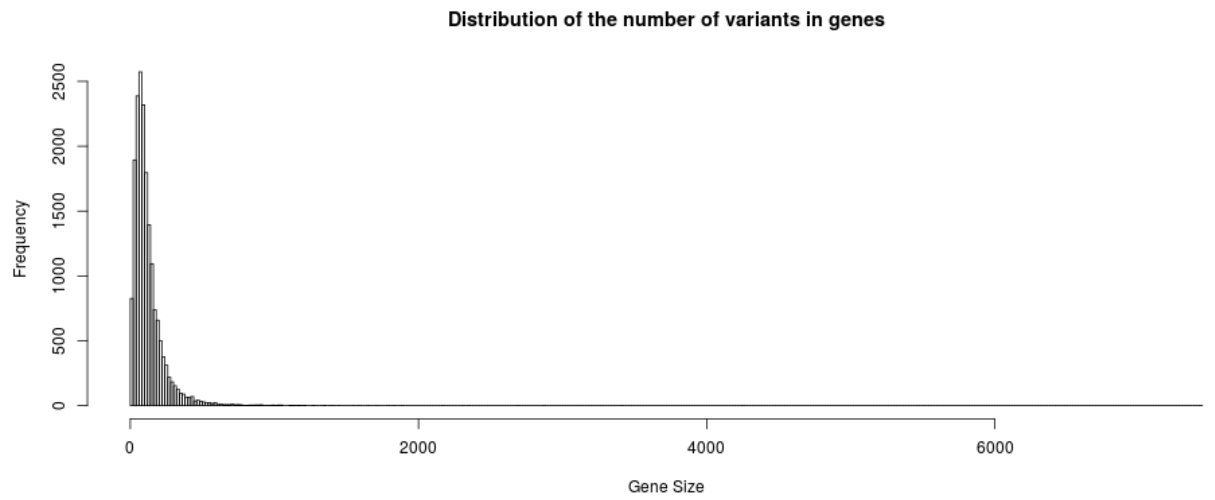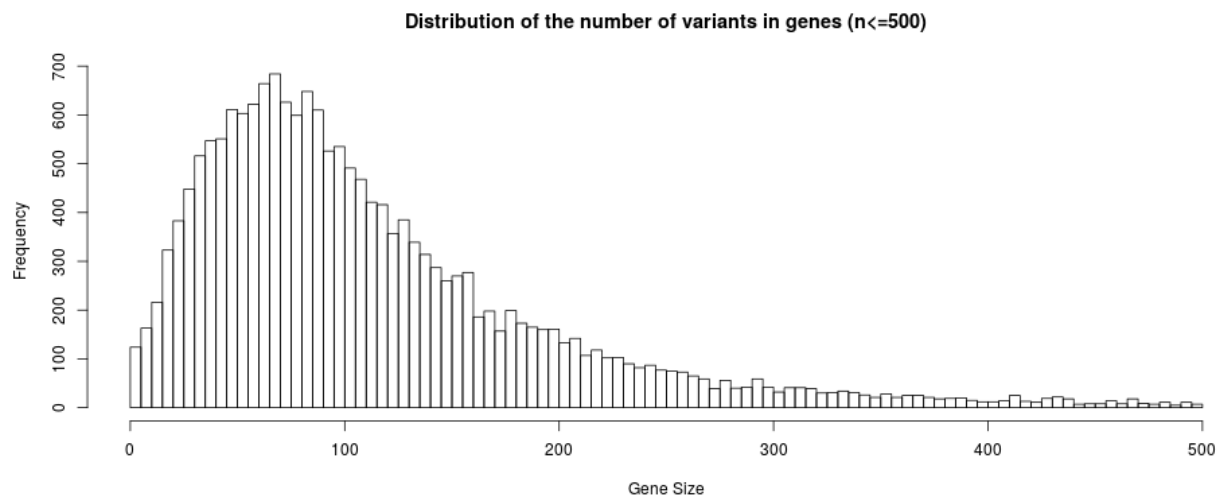

Figure S2. The distribution of the number of variants in genes in the UK-Biobank WES data.

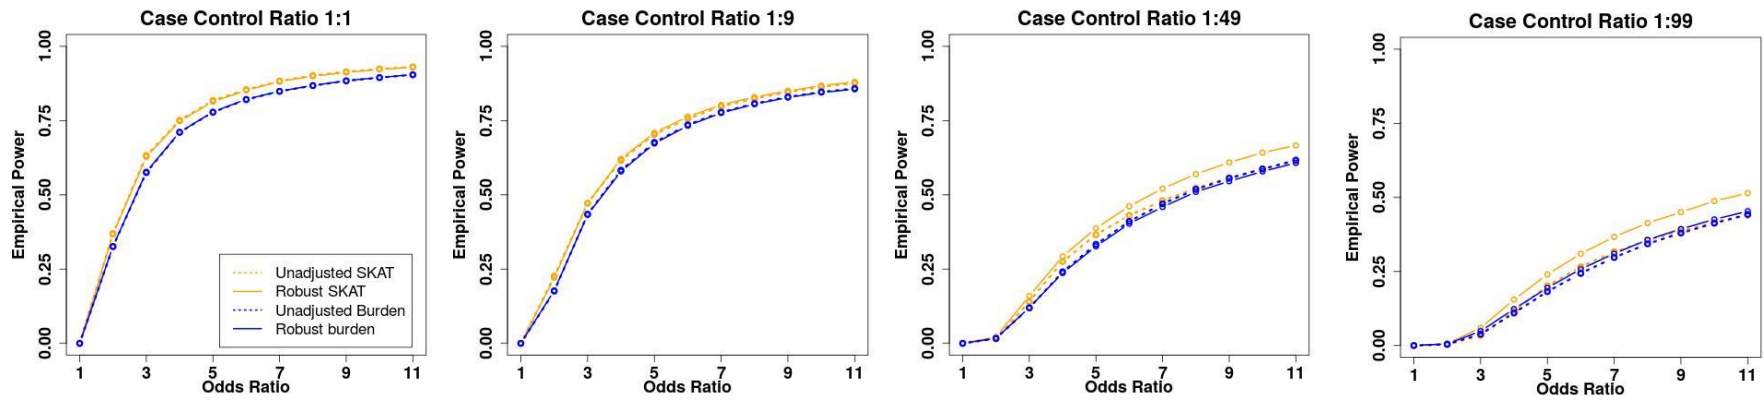

Figure S3. Empirical power estimates for the unadjusted and robust version of SKAT and burden test where 30% of variants were causal variants and all causal variants were risk-increasing. The X-axis represents the genetic effect odds ratio and the Y-axis represents the empirical power. All causal variants had the same odds ratios.

(A) Region length 2kb

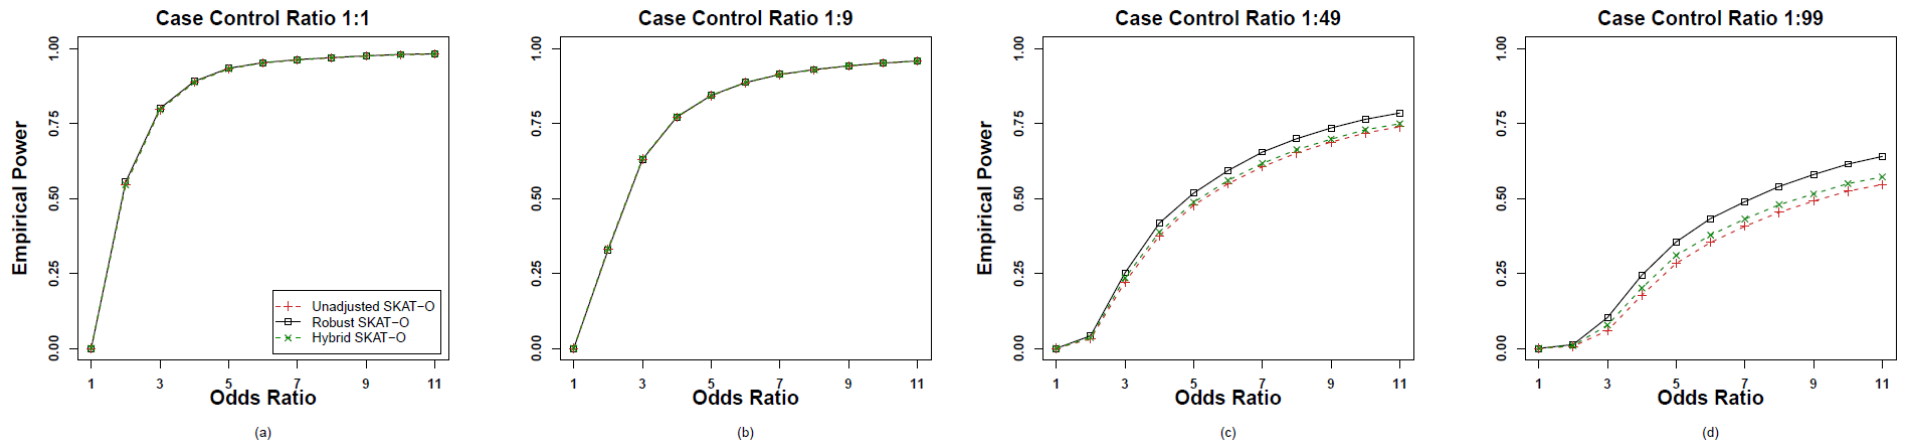

(B) Region length 3kb

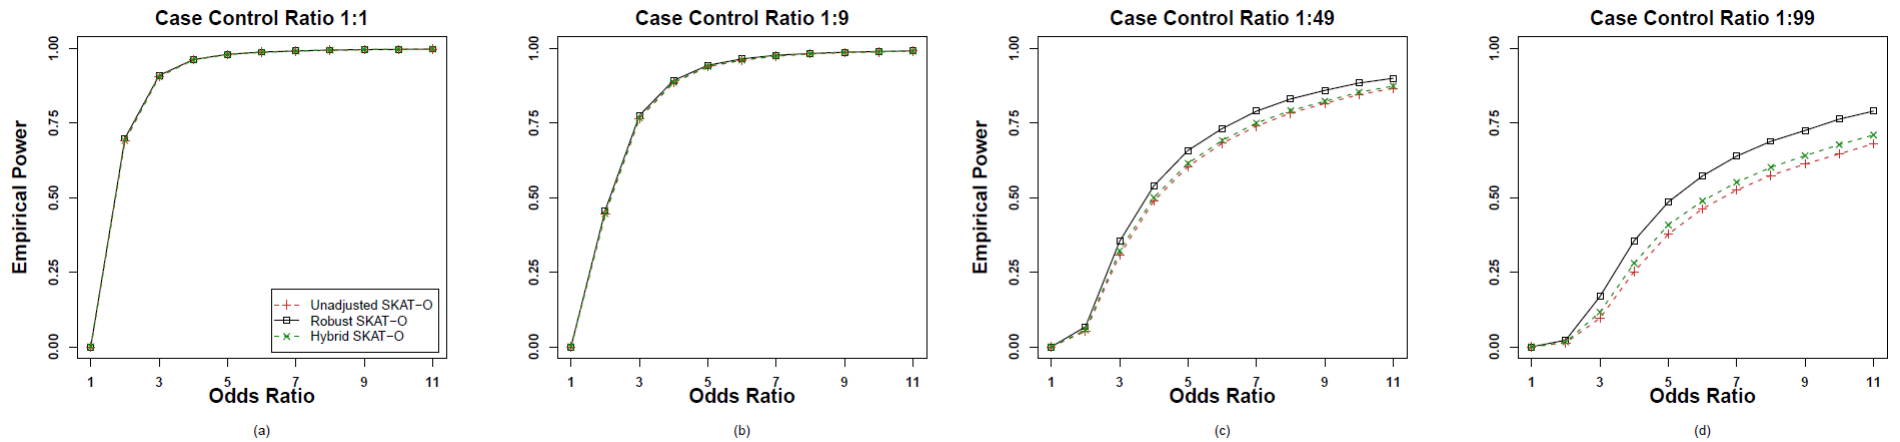

Figure S4. Empirical power estimates for the unadjusted and robust versions of SKAT-O and hybrid method where 30% of variants were causal variants. 80% causal variants were risk-increasing and 20% were risk-decreasing. The sample size was 50,000 and 10,000 datasets were generated. The X-axis represents the genetic effect odds ratio and the Y-axis represents the empirical power. (A) Region length is 2kb. (B) Region length is 3kb.

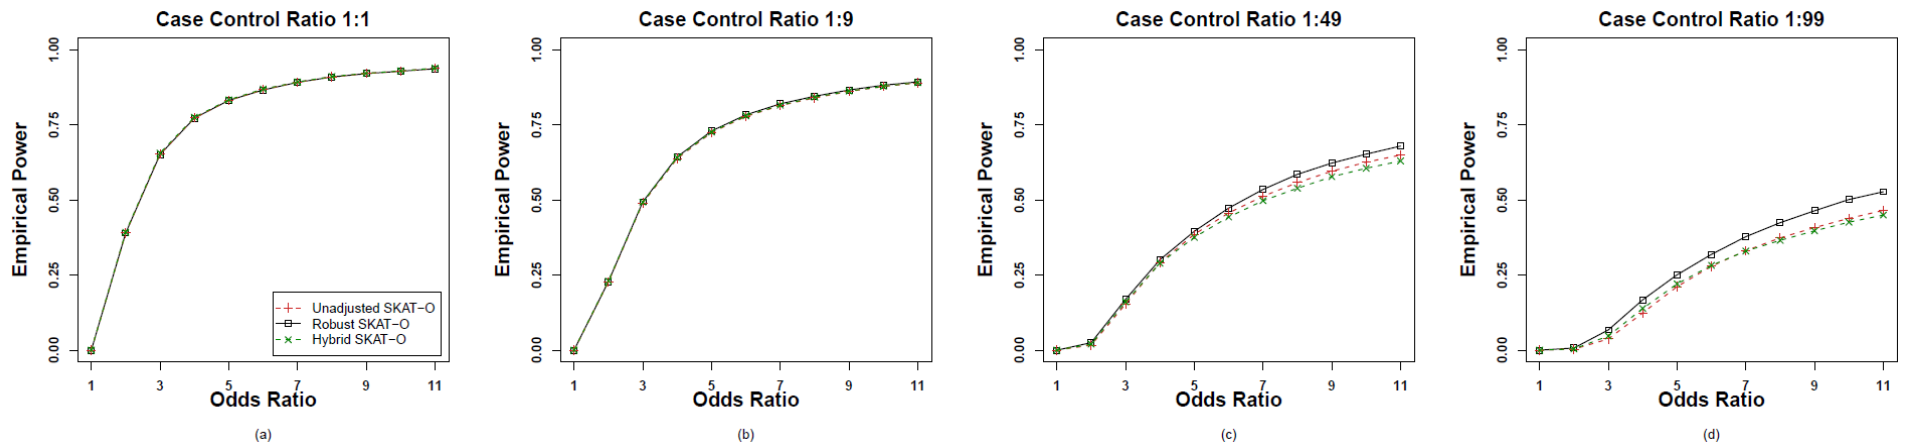

Figure S5. Empirical power estimates for the unadjusted and robust versions of SKAT-O and hybrid method where 30% of variants were causal variants. All causal variants were risk-increasing. The sample size was 50,000 and 10,000 datasets were generated with region length 1kb. The X-axis represents the genetic effect odds ratio and the Y-axis represents the empirical power.

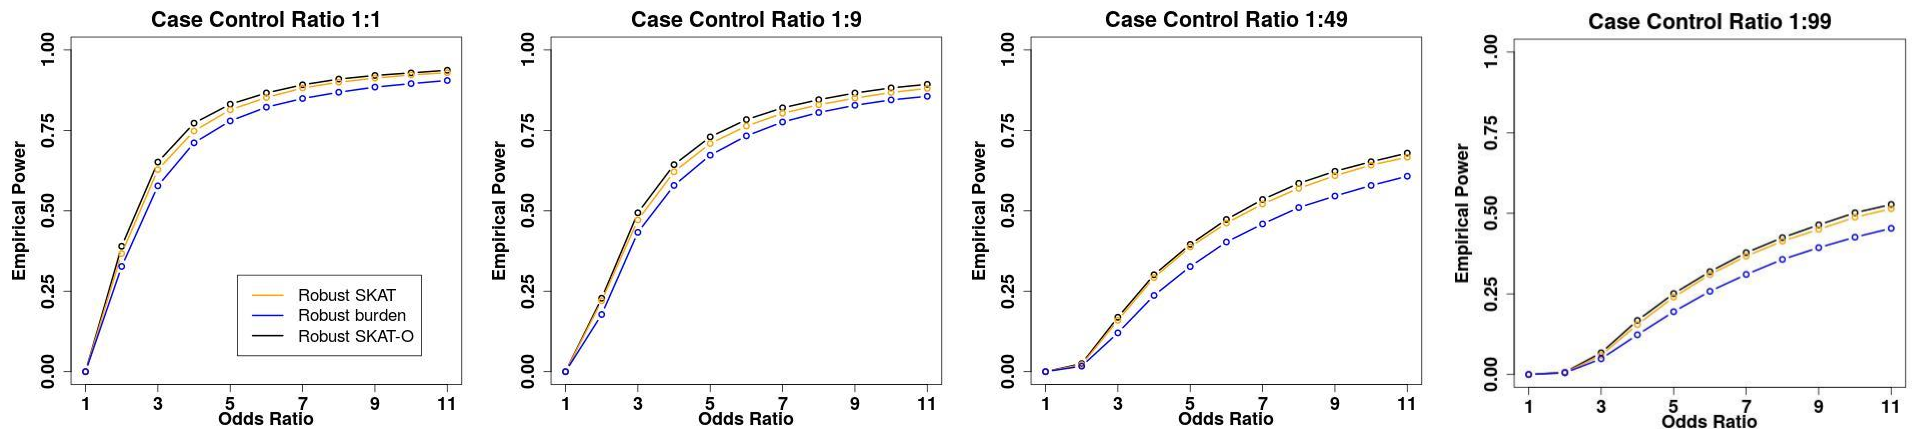

Figure S6. Empirical power estimates for robust SKAT, burden and SKAT-O where 30% of variants were causal variants and all causal variants were risk-increasing. The X-axis represents the genetic effect odds ratio and the Y-axis represents the empirical power. All causal variants had the same odds ratios.

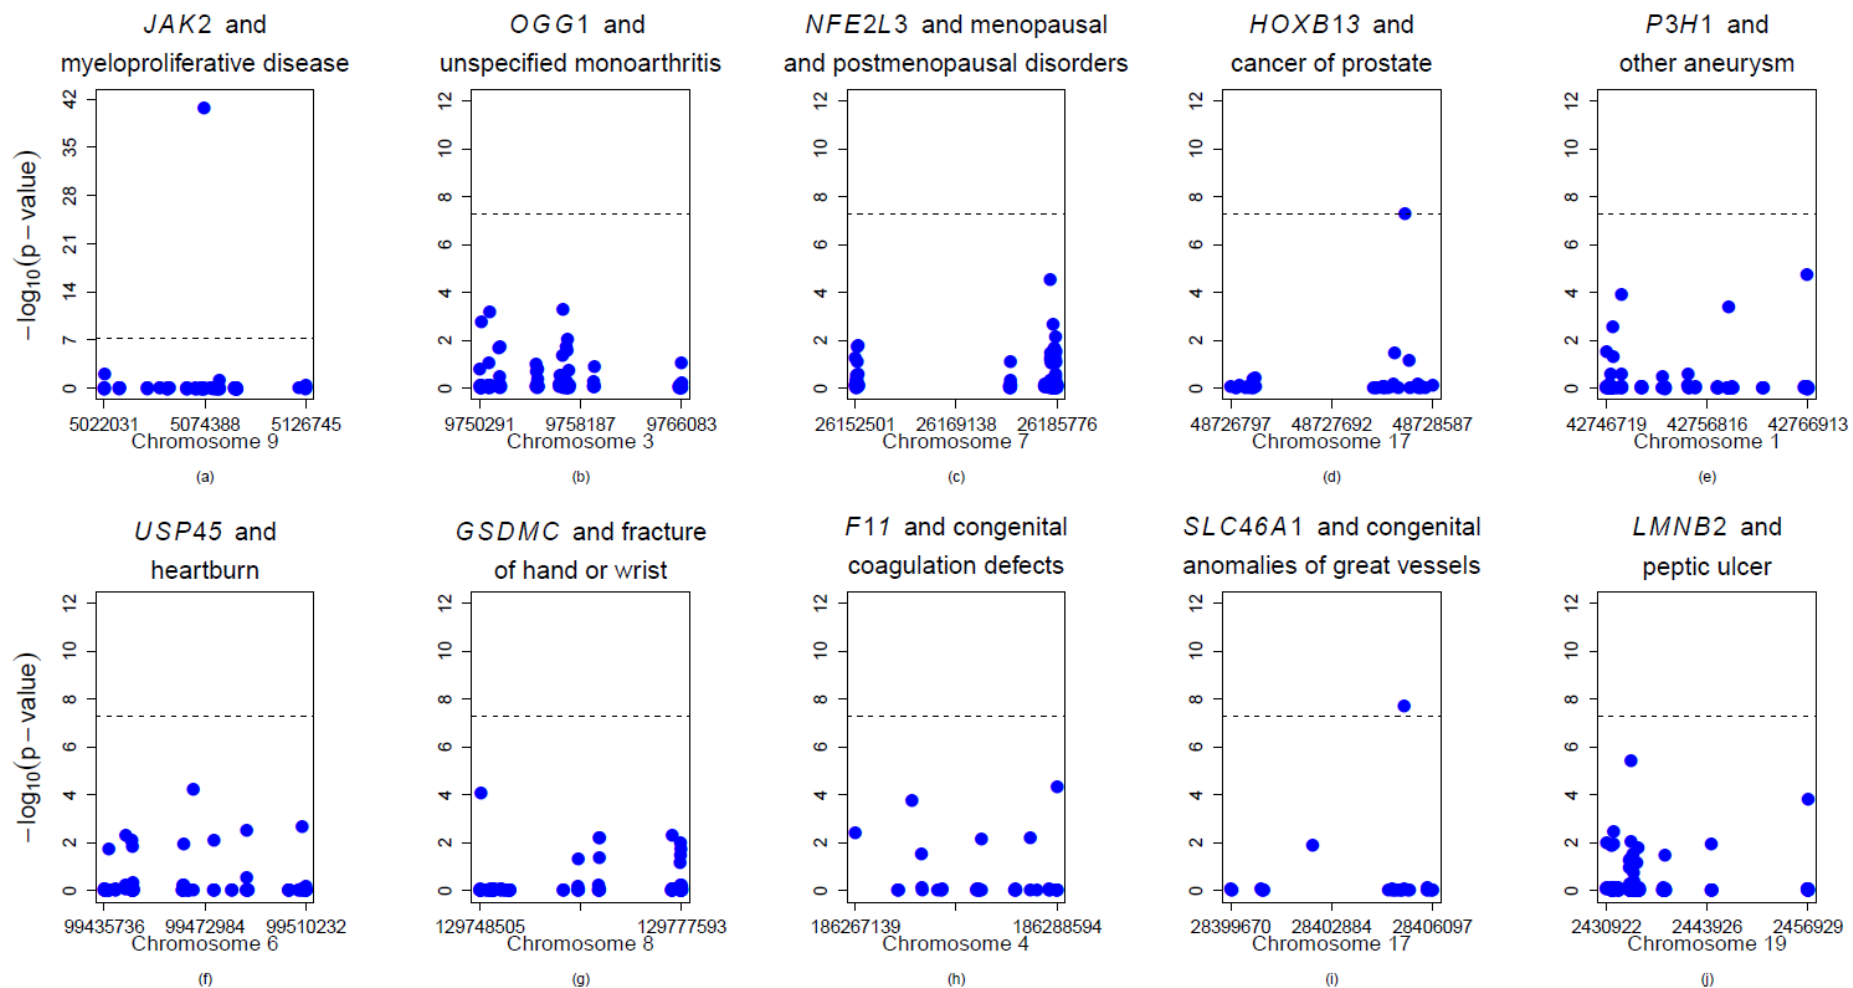

Figure S7. P-values of single variants in 10 significant genes. The X-axis represents the position of each single variant in the gene, and the Y-axis represents the negative log<sub>10</sub> p-values of single variants. The dashed line represents the cutoff of  $5 \times 10^{-8}$ .



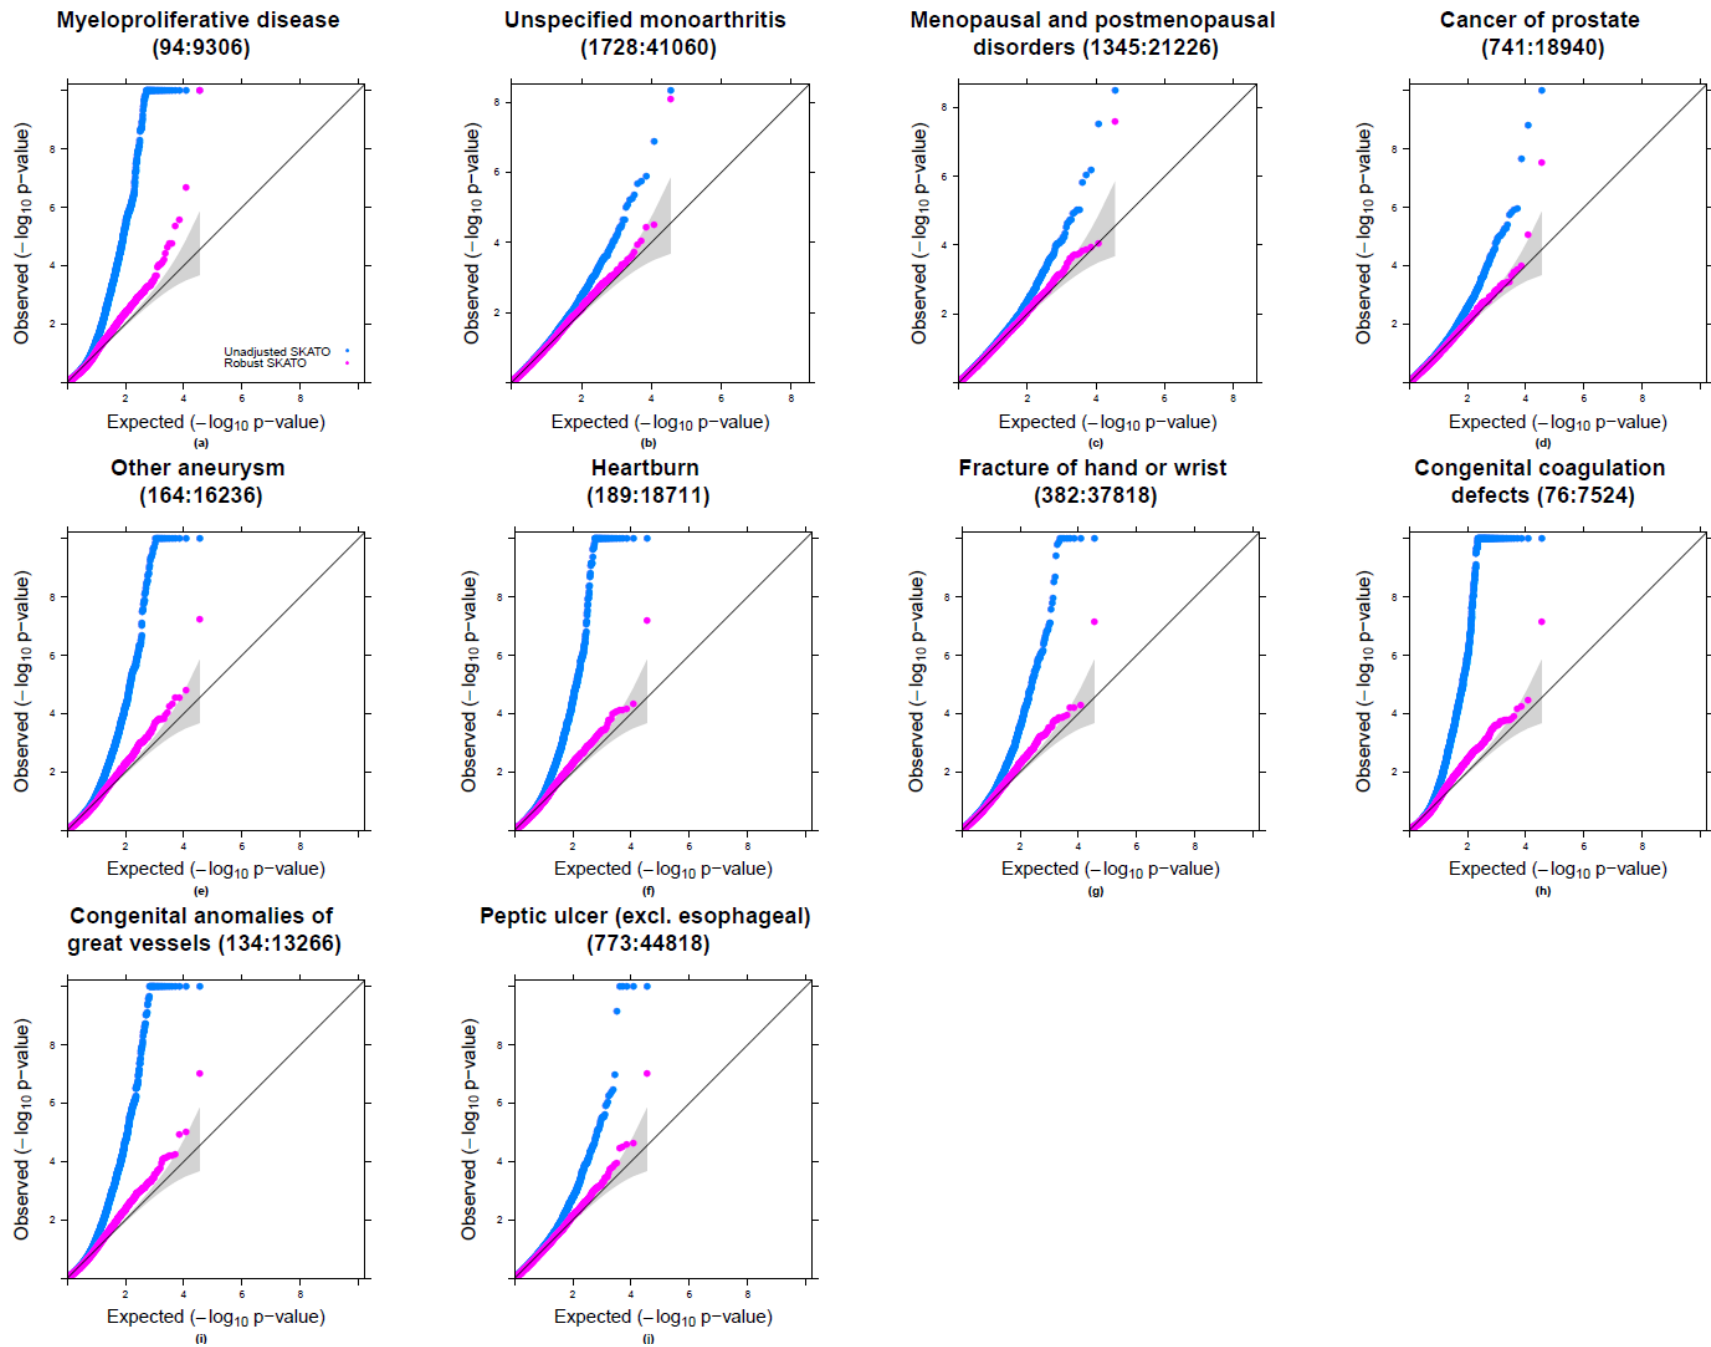

Figure S8. QQ Plots of SKAT-O p-values of 10 selected phenotypes. The X-axis represents the expected negative log<sub>10</sub> p-values and the Y-axis represents the observed negative log<sub>10</sub> p-values of genes.

## Supplemental Tables

Table S1. Type I error rate divided by  $\alpha$  of different methods when testing an association with dichotomous traits at stringent  $\alpha$  levels  $\alpha = 10^{-2}, 10^{-4}$  and  $2.5 \times 10^{-6}$ . The sample size was 50,000 and  $10^7$  datasets were generated.

| $\alpha$             | Case:<br>Control | SKAT   | Robust<br>SKAT<br>without<br>additional<br>adjustment | Robust<br>SKAT | Burden | Robust<br>burden<br>without<br>additional<br>adjustment | Robust<br>burden | SKAT-<br>O | Robust<br>SKAT-O<br>without<br>additional<br>adjustment | Robust<br>SKAT-O | Hybrid<br>SKAT-O |
|----------------------|------------------|--------|-------------------------------------------------------|----------------|--------|---------------------------------------------------------|------------------|------------|---------------------------------------------------------|------------------|------------------|
| $10^{-2}$            | 1:1              | 0.99   | 0.99                                                  | 0.99           | 1.00   | 1.00                                                    | 1.00             | 1.11       | 1.11                                                    | 1.11             | 1.09             |
|                      | 1:9              | 1.01   | 1.01                                                  | 1.01           | 0.99   | 0.99                                                    | 1.00             | 1.13       | 1.13                                                    | 1.13             | 1.09             |
|                      | 1:49             | 1.44   | 1.24                                                  | 1.22           | 1.02   | 0.95                                                    | 0.95             | 1.44       | 1.24                                                    | 1.23             | 1.27             |
|                      | 1:99             | 1.92   | 1.44                                                  | 1.41           | 1.07   | 0.92                                                    | 0.91             | 1.82       | 1.36                                                    | 1.33             | 1.53             |
|                      | 1:199            | 2.74   | 1.76                                                  | 1.71           | 1.19   | 0.91                                                    | 0.88             | 2.47       | 1.56                                                    | 1.52             | 2.00             |
|                      | 1:399            | 3.99   | 2.22                                                  | 2.14           | 1.44   | 0.94                                                    | 0.89             | 3.47       | 1.88                                                    | 1.82             | 2.75             |
| $10^{-4}$            | 1:1              | 0.99   | 0.98                                                  | 1.03           | 1.02   | 1.03                                                    | 1.00             | 1.27       | 1.28                                                    | 1.32             | 1.27             |
|                      | 1:9              | 1.39   | 1.11                                                  | 1.14           | 1.12   | 1.08                                                    | 0.99             | 1.65       | 1.43                                                    | 1.40             | 1.52             |
|                      | 1:49             | 6.31   | 1.79                                                  | 1.65           | 2.43   | 1.56                                                    | 0.97             | 6.16       | 2.33                                                    | 1.79             | 4.54             |
|                      | 1:99             | 13.48  | 2.42                                                  | 2.13           | 3.95   | 2.05                                                    | 1.02             | 12.77      | 3.23                                                    | 2.17             | 8.89             |
|                      | 1:199            | 28.84  | 3.42                                                  | 2.89           | 6.79   | 2.54                                                    | 1.01             | 26.55      | 4.38                                                    | 2.72             | 17.95            |
|                      | 1:399            | 61.28  | 4.86                                                  | 3.79           | 11.71  | 2.84                                                    | 0.95             | 55.65      | 5.75                                                    | 3.37             | 36.76            |
| $2.5 \times 10^{-6}$ | 1:1              | 1.24   | 1.03                                                  | 1.54           | 1.11   | 0.94                                                    | 1.03             | 1.38       | 1.19                                                    | 1.38             | 1.40             |
|                      | 1:9              | 2.47   | 1.19                                                  | 1.45           | 1.29   | 1.41                                                    | 0.77             | 2.51       | 1.61                                                    | 1.49             | 2.23             |
|                      | 1:49             | 28.27  | 1.80                                                  | 1.91           | 6.88   | 2.91                                                    | 1.06             | 23.70      | 3.24                                                    | 1.98             | 16.69            |
|                      | 1:99             | 89.53  | 2.67                                                  | 1.81           | 16.34  | 3.80                                                    | 0.90             | 71.32      | 4.87                                                    | 1.60             | 42.59            |
|                      | 1:199            | 262.60 | 4.62                                                  | 3.16           | 39.57  | 5.99                                                    | 1.17             | 211.90     | 7.93                                                    | 2.80             | 126.26           |
| 1:399                | 715.05           | 6.70   | 3.90                                                  | 86.87          | 6.65   | 0.80                                                    | 577.70           | 10.70      | 2.83                                                    | 347.10           |                  |

Table S2. Type I error rate divided by  $\alpha$  of robust SKAT-O when testing an association with dichotomous traits at stringent  $\alpha$  levels  $\alpha = 10^{-2}$ ,  $10^{-4}$  and  $2.5 \times 10^{-6}$  with three different region length (1) 1kb; (2) 2kb; (3) 3kb. The sample size was 50,000 and  $10^7$  datasets were generated.

| $\alpha$             | Case: control | Region<br>length 1kb   | Region<br>length 2kb   | Region<br>length 3kb   |
|----------------------|---------------|------------------------|------------------------|------------------------|
|                      |               | Mean:16.33<br>SD: 4.05 | Mean:32.69<br>SD: 5.65 | Mean:49.05<br>SD: 6.71 |
| $10^{-2}$            | 1:1           | 1.11                   | 1.11                   | 1.10                   |
|                      | 1:9           | 1.13                   | 1.11                   | 1.11                   |
|                      | 1:49          | 1.23                   | 1.19                   | 1.18                   |
|                      | 1:99          | 1.33                   | 1.29                   | 1.27                   |
| $10^{-4}$            | 1:1           | 1.32                   | 1.15                   | 1.14                   |
|                      | 1:9           | 1.40                   | 1.18                   | 1.20                   |
|                      | 1:49          | 1.79                   | 1.73                   | 1.67                   |
|                      | 1:99          | 2.17                   | 2.09                   | 1.99                   |
| $2.5 \times 10^{-6}$ | 1:1           | 1.38                   | 0.96                   | 1.04                   |
|                      | 1:9           | 1.49                   | 1.56                   | 1.08                   |
|                      | 1:49          | 1.98                   | 2.24                   | 1.60                   |
|                      | 1:99          | 1.60                   | 2.44                   | 2.08                   |

Table S3. Type I error rate divided by  $\alpha$  of different methods when testing an association between all variants, including both common and rare variants, and dichotomous traits at stringent  $\alpha$  levels  $\alpha = 10^{-2}$ ,  $10^{-4}$  and  $2.5 \times 10^{-6}$ . The sample size was 50,000 and  $10^7$  datasets were generated.

| $\alpha$             | Case:<br>control | SKAT-<br>CommonRare | Robust SKAT-<br>CommonRare<br>without<br>additional<br>adjustment | Robust SKAT-<br>CommonRare |
|----------------------|------------------|---------------------|-------------------------------------------------------------------|----------------------------|
| $10^{-2}$            | 1:1              | 1.00                | 0.99                                                              | 0.99                       |
|                      | 1:9              | 1.00                | 1.01                                                              | 1.01                       |
|                      | 1:49             | 1.11                | 1.22                                                              | 1.22                       |
|                      | 1:99             | 1.26                | 1.42                                                              | 1.41                       |
|                      | 1:199            | 1.52                | 1.71                                                              | 1.72                       |
|                      | 1:399            | 1.97                | 2.15                                                              | 2.15                       |
| $10^{-4}$            | 1:1              | 0.98                | 0.98                                                              | 1.04                       |
|                      | 1:9              | 1.09                | 1.11                                                              | 1.13                       |
|                      | 1:49             | 2.42                | 1.73                                                              | 1.69                       |
|                      | 1:99             | 4.20                | 2.26                                                              | 2.21                       |
|                      | 1:199            | 7.84                | 3.02                                                              | 3.03                       |
|                      | 1:399            | 16.02               | 4.01                                                              | 4.04                       |
| $2.5 \times 10^{-6}$ | 1:1              | 0.94                | 1.05                                                              | 1.66                       |
|                      | 1:9              | 1.53                | 1.17                                                              | 1.45                       |
|                      | 1:49             | 7.48                | 1.57                                                              | 1.94                       |
|                      | 1:99             | 18.54               | 2.50                                                              | 1.93                       |
|                      | 1:199            | 50.43               | 3.87                                                              | 3.37                       |
|                      | 1:399            | 140.09              | 4.47                                                              | 4.46                       |

Table S4. Gene-phenotype associations detected by Robust SKAT-O across 791 phenotypes at  $\alpha=2.5 \times 10^{-6}$  (Number of associations=111)

See excel file “Table S4.xlsx”.

Table S5. Top 3 single rare-variant signals of associations with p-value < 10<sup>-7</sup> in the UK Biobank WES data.

| Phenotype (Phecode)                            | Gene Name      | RS ID       | Location        | MAF      | P-value  | Annotation          | Polyphen             | SIFT                       |
|------------------------------------------------|----------------|-------------|-----------------|----------|----------|---------------------|----------------------|----------------------------|
| Myeloproliferative disease (200)               | <i>JAK2</i>    | rs77375493  | 9:5073770:G:T   | 1.38E-03 | 1.81E-41 | nonsynonymous SNV   | probably_damaging    | deleterious                |
|                                                |                | -           | 9:5022213:G:T   | 1.06E-04 | 7.16E-03 | nonsynonymous SNV   | probably_damaging    | deleterious                |
|                                                |                | rs150221602 | 9:5081828:G:C   | 1.12E-03 | 5.07E-02 | nonsynonymous SNV   | benign               | deleterious                |
| Unspecified monoarthritis (716.2)              | <i>OGG1</i>    | rs113561019 | 3:9756791:G:A   | 5.67E-03 | 4.67E-04 | nonsynonymous SNV   | probably_damaging    | deleterious                |
|                                                |                | rs17050550  | 3:9751060:G:T   | 2.66E-03 | 5.96E-04 | nonsynonymous SNV   | benign               | tolerated                  |
|                                                |                | rs104893751 | 3:9750423:G:A   | 3.89E-03 | 1.69E-03 | nonsynonymous SNV   | probably_damaging    | deleterious                |
| Menopausal and postmenopausal disorders (627)  | <i>NFE2L3</i>  | rs148235978 | 7:26184630:A:G  | 7.93E-03 | 2.72E-05 | nonsynonymous SNV   | benign               | deleterious                |
|                                                |                | rs148159120 | 7:26185140:G:A  | 5.91E-03 | 2.18E-03 | nonsynonymous SNV   | benign               | tolerated                  |
|                                                |                | rs144789579 | 7:26185559:A:G  | 3.33E-04 | 6.71E-03 | nonsynonymous SNV   | benign               | tolerated                  |
| Cancer of prostate (185)                       | <i>HOXB13</i>  | rs138213197 | 17:48728343:C:T | 2.16E-03 | 5.24E-08 | nonsynonymous SNV   | probably_damaging    | deleterious                |
|                                                |                | rs764401781 | 17:48728250:G:A | 7.62E-05 | 3.37E-02 | nonsynonymous SNV   | benign               | deleterious                |
|                                                |                | rs774579054 | 17:48728379:C:A | 1.02E-04 | 7.05E-02 | nonsynonymous SNV   | possibly_damaging    | tolerated                  |
| Other aneurysm (442)                           | <i>P3H1</i>    | rs372710498 | 1:42766778:C:T  | 6.71E-04 | 1.71E-05 | nonsynonymous SNV   | probably_damaging    | tolerated                  |
|                                                |                | rs140254470 | 1:42748243:C:T  | 3.35E-04 | 1.21E-04 | nonsynonymous SNV   | benign               | tolerated                  |
|                                                |                | rs372301077 | 1:42758970:C:G  | 9.15E-05 | 3.88E-04 | nonsynonymous SNV   | probably_damaging    | deleterious                |
| Heartburn (530.9)                              | <i>USP45</i>   | rs554927779 | 6:99468543:D:1  | 4.52E-03 | 5.39E-05 | frameshift deletion | LoF: High-confidence | -                          |
|                                                |                | rs201110065 | 6:99508768:G:T  | 3.70E-04 | 2.13E-03 | nonsynonymous SNV   | probably_damaging    | deleterious_low_confidence |
|                                                |                | rs144269307 | 6:99488237:G:A  | 2.65E-05 | 2.78E-03 | nonsynonymous SNV   | possibly_damaging    | tolerated                  |
| Fracture of hand or wrist (804)                | <i>GSDMC</i>   | rs149748731 | 8:129748706:G:A | 3.17E-03 | 8.17E-05 | nonsynonymous SNV   | possibly_damaging    | tolerated                  |
|                                                |                | rs79403769  | 8:129776220:C:A | 1.14E-03 | 4.95E-03 | nonsynonymous SNV   | benign               | deleterious                |
|                                                |                | rs16904151  | 8:129765749:C:T | 6.54E-04 | 5.81E-03 | nonsynonymous SNV   | benign               | tolerated                  |
| Congenital coagulation defects (286.1)         | <i>F11</i>     | rs281875276 | 4:186288589:T:G | 1.32E-04 | 4.52E-05 | nonsynonymous SNV   | probably_damaging    | deleterious                |
|                                                |                | rs140190776 | 4:186273178:G:A | 1.97E-04 | 1.73E-04 | splicing            | LoF: High-confidence | -                          |
|                                                |                | -           | 4:186267139:G:T | 6.58E-05 | 3.85E-03 | nonsynonymous SNV   | probably_damaging    | deleterious                |
| Congenital anomalies of great vessels (747.13) | <i>SLC46A1</i> | rs189103810 | 17:28405185:A:T | 1.75E-03 | 1.86E-08 | nonsynonymous SNV   | possibly_damaging    | deleterious                |
|                                                |                | rs281875211 | 17:28402276:C:T | 3.73E-05 | 1.24E-02 | nonsynonymous SNV   | possibly_damaging    | deleterious                |
|                                                |                | rs41297071  | 17:28405926:C:G | 5.22E-04 | 7.13E-01 | nonsynonymous SNV   | benign               | tolerated                  |
| Peptic ulcer (excl. esophageal) (531)          | <i>LMNB2</i>   | rs752957340 | 19:2434094:G:A  | 2.30E-04 | 3.83E-06 | nonsynonymous SNV   | probably_damaging    | deleterious                |
|                                                |                | -           | 19:2456926:G:T  | 2.19E-05 | 1.47E-04 | nonsynonymous SNV   | -                    | -                          |
|                                                |                | -           | 19:2431845:C:A  | 1.10E-05 | 3.45E-03 | nonsynonymous SNV   | benign               | deleterious                |

Table S6. The most significant nearby variant association signals ( $\pm 100$  Kbp up and down stream) in the UK-Biobank imputed datasets of 400,000 British samples.

| Phenotype (Phecode)                            | Gene Name      | RS ID       | Location       | Ref Allele | Alt Allele | MAF      | p-value  |
|------------------------------------------------|----------------|-------------|----------------|------------|------------|----------|----------|
| Myeloproliferative disease (200)               | <i>JAK2</i>    | rs10283564  | chr9:5075628   | C          | G          | 2.51E-01 | 2.30E-17 |
| Unspecified monoarthritis (716.2)              | <i>OGG1</i>    | rs75924392  | chr3:9797369   | A          | G          | 4.25E-02 | 4.28E-04 |
| Menopausal and postmenopausal disorders (627)  | <i>NFE2L3</i>  | rs35838658  | chr7:26175486  | T          | A          | 3.48E-01 | 2.14E-04 |
| Cancer of prostate (185)                       | <i>HOXB13</i>  | rs145922598 | chr17:48733224 | C          | T          | 3.27E-02 | 1.17E-04 |
| Other aneurysm (442)                           | <i>P3H1</i>    | rs148797090 | chr1:42818294  | T          | C          | 1.35E-02 | 1.22E-03 |
| Heartburn (530.9)                              | <i>USP45</i>   | rs75597991  | chr6:99367094  | G          | C          | 2.38E-02 | 4.08E-02 |
| Fracture of hand or wrist (804)                | <i>GSDMC</i>   | rs409790    | chr8:129833249 | A          | G          | 8.28E-01 | 1.84E-02 |
| Congenital coagulation defects (286.1)         | <i>F11</i>     | rs115583874 | chr4:186260648 | G          | T          | 1.37E-02 | 6.30E-03 |
| Congenital anomalies of great vessels (747.13) | <i>SLC46A1</i> | rs111306228 | chr17:28425402 | C          | A          | 2.06E-02 | 2.29E-03 |
| Peptic ulcer (excl. esophageal) (531)          | <i>LMNB2</i>   | rs146283067 | chr19:2441769  | G          | T          | 1.62E-02 | 1.31E-03 |
